# Supplementary material
Source: PubMed Central journal article supplement (PMC3987673)

**Supplementary Table 1** Hematological profile of mice injected with 500ug LPS for 4 hours, 100 ug PolyI:C daily for 5 days, with 1000 CFUs I.V. of *Salmonella* Typhimurium or with control PBS. PolyI:C induced a lymphopenia, monocytopenia and thrombocytopenia in *Ity9* mice.

**Supplementary Figure 1** Initial mapping of the *Ity9* mutation to two potential chromosomal locations (6 and 14) using 6 affected mice (225, 227, 245, 246, 247, 248). 129S1 alleles are represented in red, C57BL/6J alleles in blue and heterozygous regions in yellow. LOD score to the right of the red line are considered significant.

### **Supplementary Figure 2**

**Clustergrams of differentially regulated genes in the spleens (a) and BMDM (b) of *Usp18<sup>Ity9</sup>/Usp18<sup>Ity9</sup>* and *Usp18<sup>Ity9</sup>/Usp18<sup>wt</sup>* littermates generated using the Web based RT2 Profiler PCR Array Data Analysis ([sabiosciences.com/pcr/arrayanalysis.php](http://sabiosciences.com/pcr/arrayanalysis.php)).** (a) Spleens were harvested at day 6 post-infection with 1000 CFUs of *Salmonella* Typhimurium. (b) BMDM were infected *in vitro* at a 10:1 ratio with *Salmonella* Typhimurium. Following mRNA extraction using RNeasy Mini Kit (Qiagen, Mississauga ON), the gene expression was evaluated using the RT<sup>2</sup>Profiler PCR Array: Mouse Interferon and Receptors (SABioscience, Frederick MD).

### **Supplementary Figure 3**

**Gene expression validation.** QRT-PCR analysis of differentially regulated genes in the spleens (a,b) and BMDM (c,d) of *Usp18<sup>Ity9</sup>/Usp18<sup>Ity9</sup>* and *Usp18<sup>Ity9</sup>/Usp18<sup>wt</sup>* littermates. Expression ratios represents the relative expression of the *Usp18<sup>Ity9</sup>/Usp18<sup>Ity9</sup>* mice compared to the *Usp18<sup>Ity9</sup>/Usp18<sup>wt</sup>* mice. Amplification data was done with Chromo4 apparatus (Bio-Rad,

Mississauga) using Brilliant SYBR green QPCR Master Mix (Stratagene). The data was analyzed using Rest2008 software (Corbett Research, Sydney) and is presented as whisker box plot.

Randomization test with 10 000 iterations were performed. (a,b) Spleens were harvested at day 6 post-infection with 1000 CFUs of *Salmonella* Typhimurium. (c,d) BMDM were infected *in vitro* at a 10:1 ratio with *Salmonella* Typhimurium. Randomization test results: (a) *Ifng*  $P < 0.0001$ , *Irf7*  $P = 0.05$ , *Irf8*  $P < 0.0001$ , (b) *Ifng*  $P = 0.001$ , *Il6*  $P = 0.001$ , *Cxcl10*  $P = 0.001$ , *Irf7*  $P < 0.0001$ , (c) *Ifnb1*  $P = 0.001$ , *Il15*  $P = < 0.0001$ , *Isg15*  $P < 0.0001$ , *Mx1*  $P = 0.001$ , (d) *Ifnb1*  $P = 0.05$ . Results are representative of two experiments. Primer sequence: *Ifnb1* 5'-CCCTATGGAGATGACGGAGA-3, 5'-TCCCACGTCAATCTTTCCTC-3', *Cxcl10* 5'-TCTGAGTGGGACTCAAGGG-3', 5'-TAAGGAGCCCTTTTAGACCTT-3', *Irf7* 5'-AGCACTTCTTCCGAGAACTG-3', 5'-TAGACAAGCACAAGCCGAGA-3', *Irf8* 5'-ATGCTTCCATCTTCAAGGCC-3', 5'-CCCAGCTTGCATTTTTGTTC-3', *Isg15* 5'-AGAGCCTGCAGCAATGGC-3', 5'-TCGCTGCAGTTCTGTACCA-3', *Ifng* 5'-ACTGGCAAAAGGATGGTGAC-3', 5'-ATCCTTTTTCGCCTTGCTGT-3', *Il6* 5'-GAGCCCACCAAGAACGATAG-3', 5'-TCCACGATTTCCCAGAGAAC-3', *Il15* 5'-TTGCAGTGCATCTCCTTACG-3', 5'-GTGCTTTGAAGAGCCAGAGG-3', *Mx1* 5'-CCCAGAGGCAGTGGTATTGT-3', 5'-ACATTTGGGGAGCTGACATC-3'.

|                                  | PBS       |            |          | LPS 4h    |            |          | PolyI:C   |            |          | Salmonella D5 |           |          |
|----------------------------------|-----------|------------|----------|-----------|------------|----------|-----------|------------|----------|---------------|-----------|----------|
|                                  | Wt (n=3)  | Ity9 (n=3) | <i>P</i> | Wt (n=3)  | Ity9 (n=3) | <i>P</i> | Wt (n=3)  | Ity9 (n=3) | <i>P</i> | Wt (n=3)      | Ity9(n=3) | <i>P</i> |
| <b>Hematocrit</b>                | 0.49±0.01 | 0.51±0.04  | 0.39     | 0.49±0.02 | 0.50±0.41  | 0.41     | 0.45±0.02 | 0.42±0.03  | 0.26     | 0.42±0.01     | 0.39±0.02 | 0.09     |
| <b>WBCx10<sup>9</sup></b>        | 6.87±0.60 | 7.30±2.38  | 0.78     | 5.23±1.31 | 4.33±0.92  | 0.38     | 9.47±2.52 | 5.53±1.43  | 0.08     | 10.23±2.4     | 4.70±1.4  | 0.03     |
| <b>Neutrox10<sup>9</sup></b>     | 1.52±0.21 | 1.51±0.96  | 0.99     | 1.26±0.41 | 1.54±0.12  | 0.32     | 1.62±0.65 | 2.24±0.76  | 0.34     | 3.22±1.6      | 0.88±0.44 | 0.07     |
| <b>Lymphox10<sup>9</sup></b>     | 4.84±0.53 | 5.18±2.68  | 0.84     | 3.73±1.62 | 2.51±0.60  | 0.29     | 6.86±2.06 | 3.21±1.11  | 0.05     | 6.19±0.15     | 3.46±0.81 | 0.01     |
| <b>Monox10<sup>9</sup></b>       | 0.35±0.15 | 0.53±0.68  | 0.68     | 0.06±0.05 | 0.14±0.11  | 0.30     | 0.75±0.20 | 0.07±0.08  | 0.01     | 0.57±0.37     | 0.36±0.33 | 0.51     |
| <b>Plateletsx10<sup>11</sup></b> | 9.04±1.22 | 6.07±3.87  | 0.28     | 5.64±0.78 | 5.06±2.67  | 0.73     | 8.22±2.42 | 1.14±0.15  | 0.01     | 3.71±1.58     | 2.22±0.62 | 0.20     |

6

12981  
B6  
DBA  
225  
227  
245  
246  
247  
248

|   |   |   |   |   |   |   |   |   |
|---|---|---|---|---|---|---|---|---|
| M | B | B | A | A | A | A | A | A |
| C | C | C | A | A | A | A | A | A |

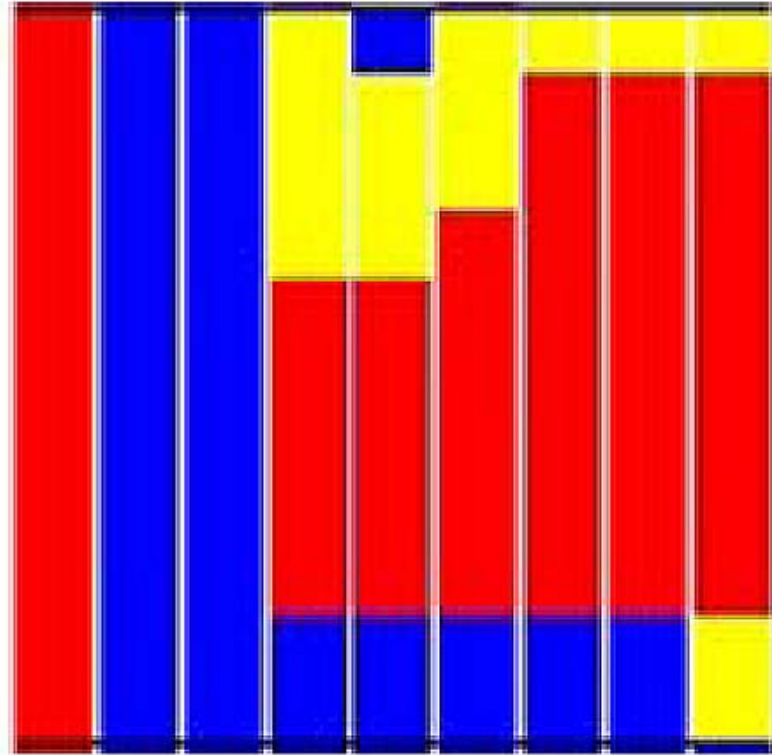

Score

ENU  
Affected

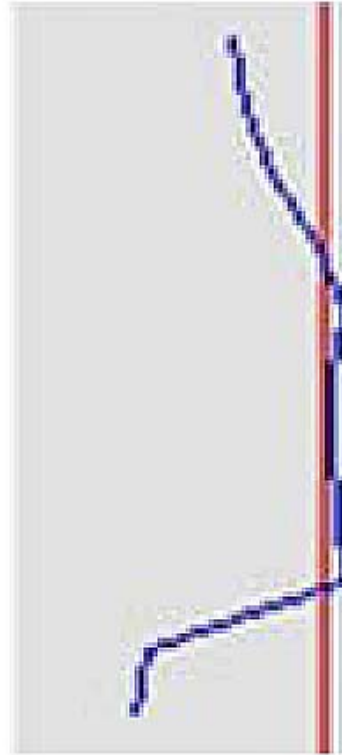

rs13478605  
rs13478612  
rs13478640  
06.026.095  
rs3710429  
rs13478845  
rs3152159  
gnf06.093.201  
rs3722170  
rs3705112  
rs13479087

A

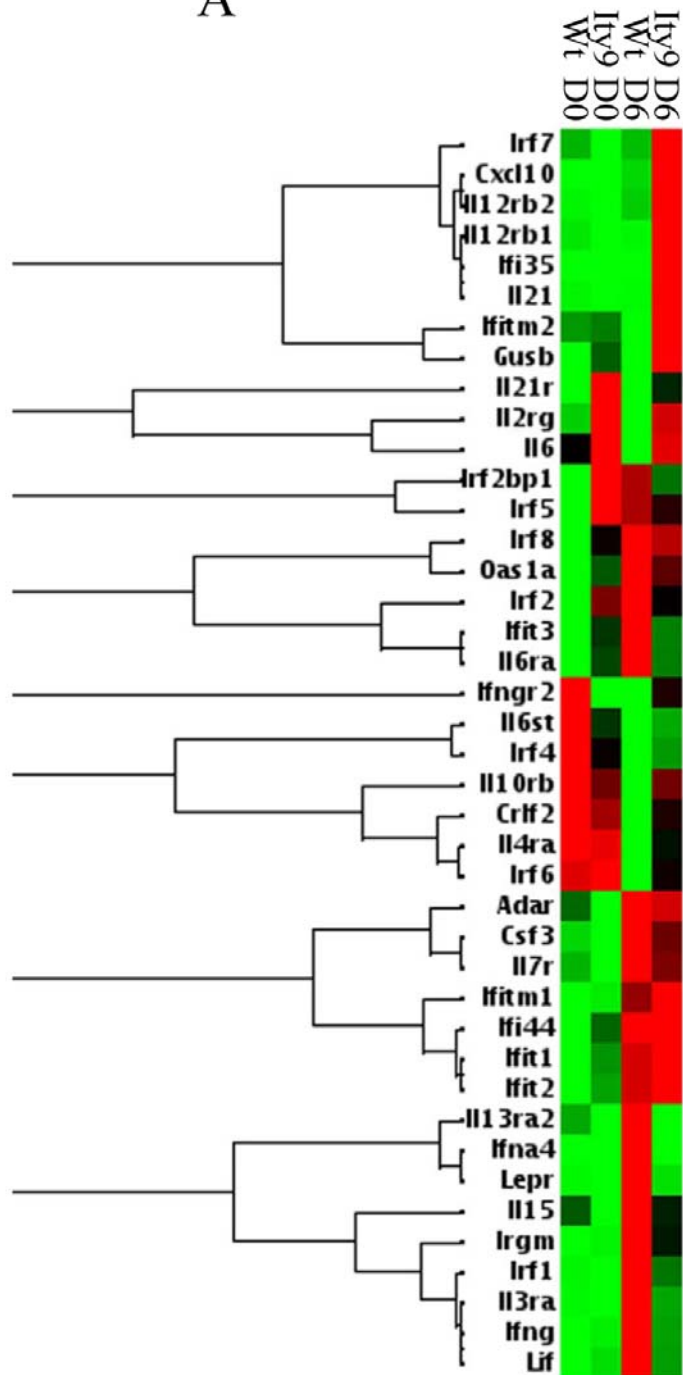

B

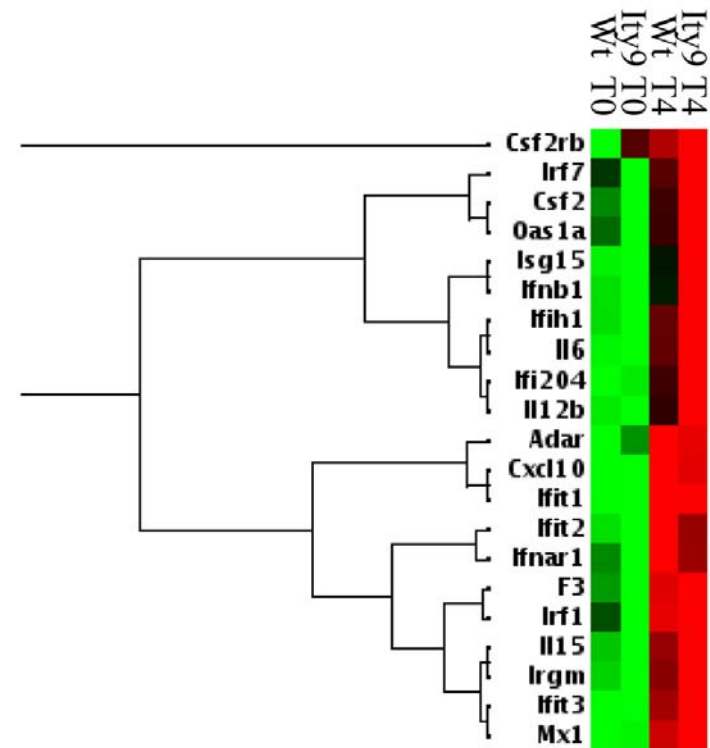

Magnitude of gene expression

min

avg

max

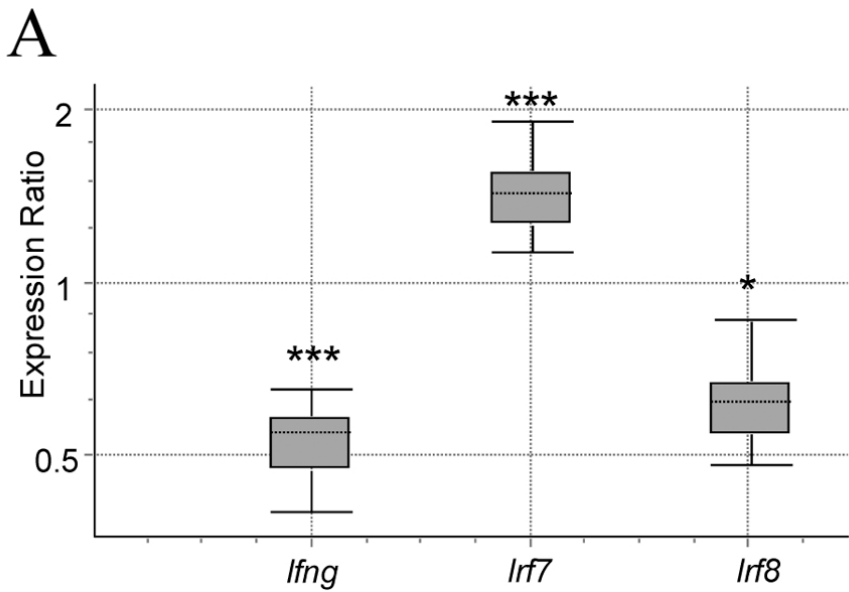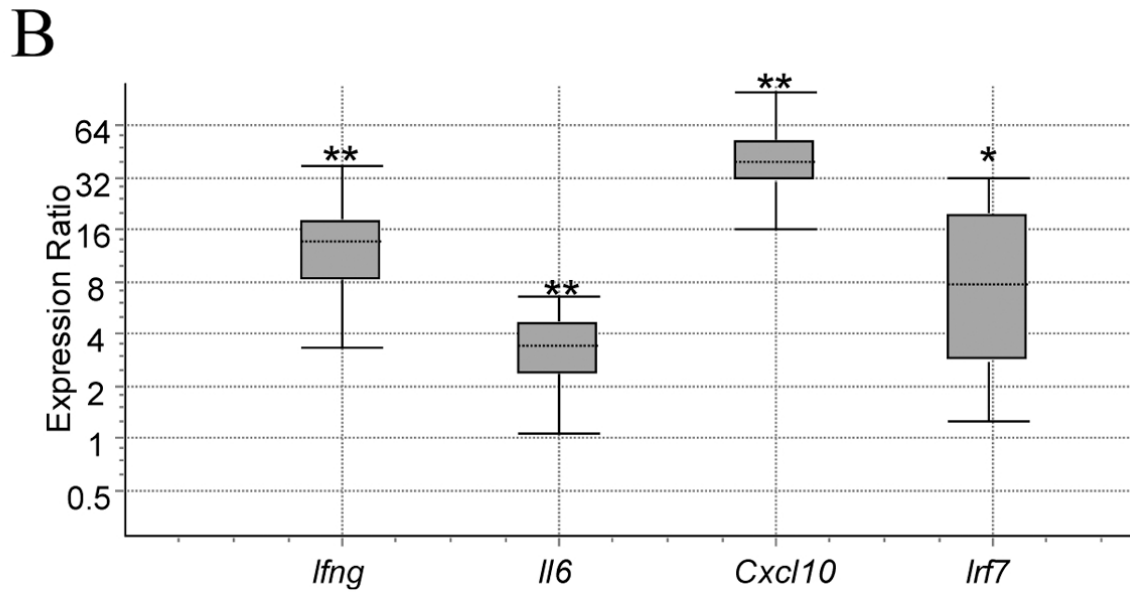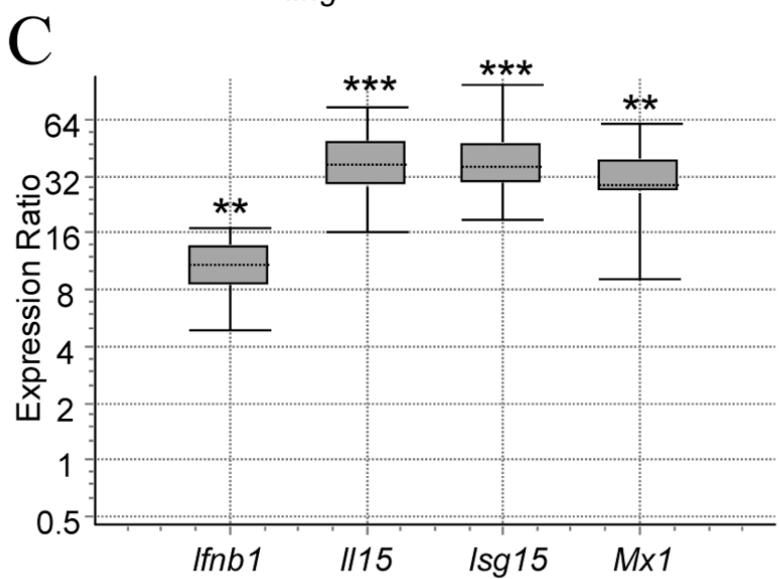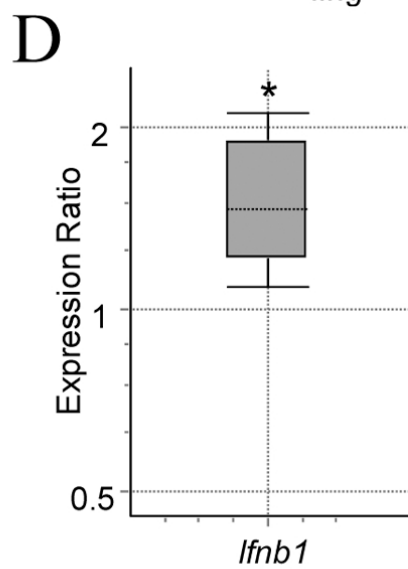

Supplement: NIHMS556752-supplement-Supplementary_information.pdf [file NIHMS556752-supplement-Supplementary_information.pdf]
